# Supplementary material for: Comparative Genomics of Pathogens Causing Brown Spot Disease of Tobacco: Alternaria longipes and Alternaria alternata
Source: PubMed Central journal article supplement (PMC4861331; doi:10.1371/journal.pone.0155258), 2016-05-09
Supplement: pone.0155258.s001.pdf [file pone.0155258.s001.pdf]

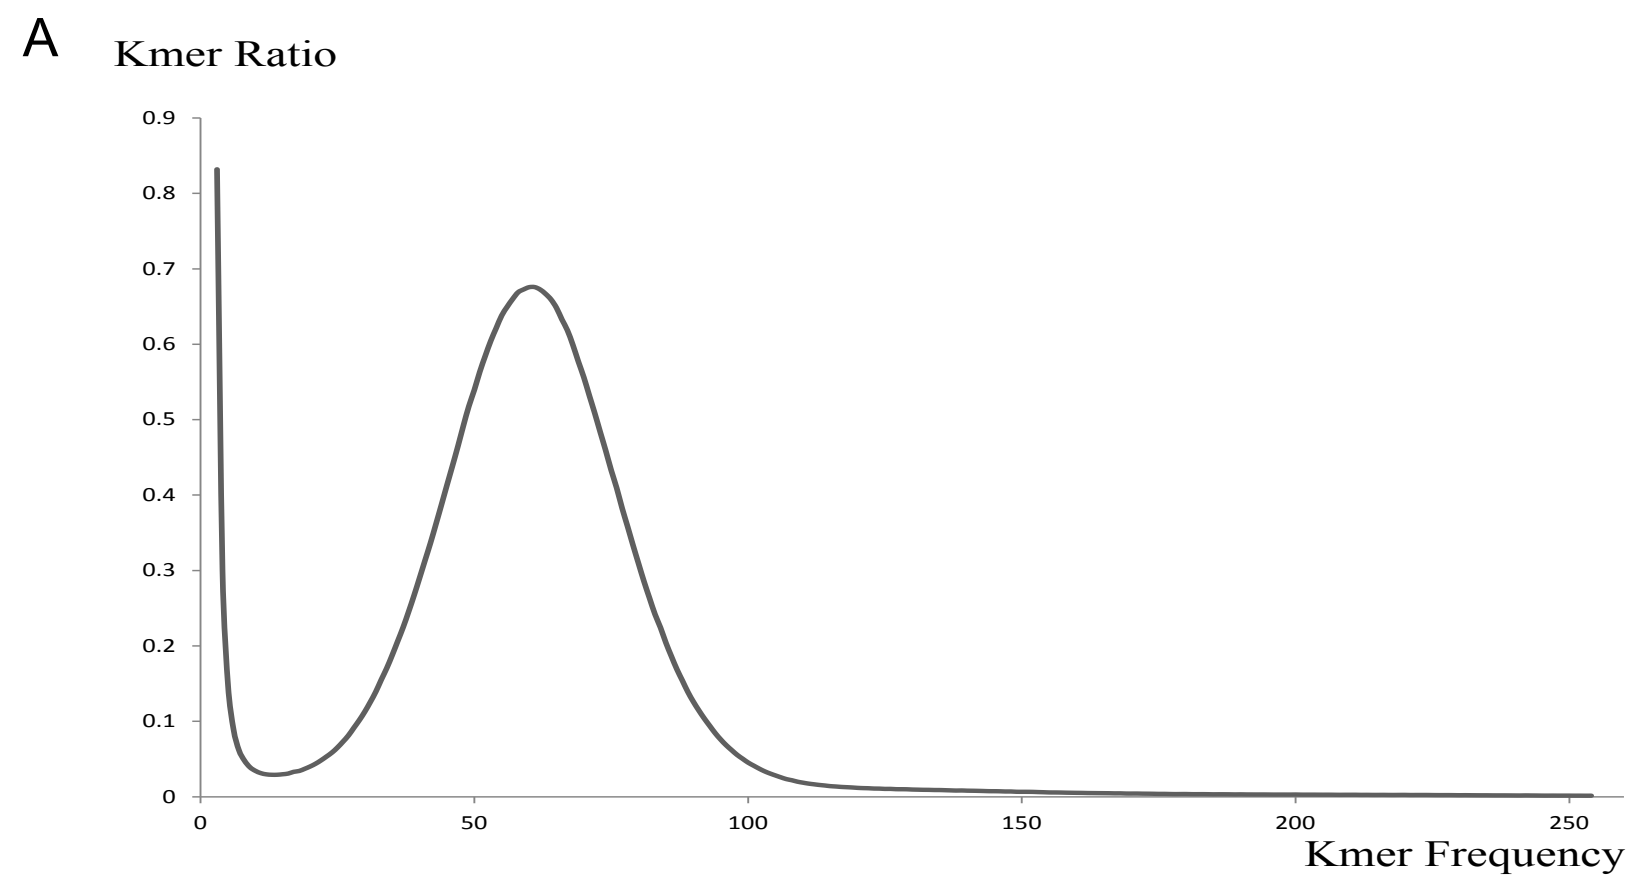

*A. longipes*  
Insert length = 916bp

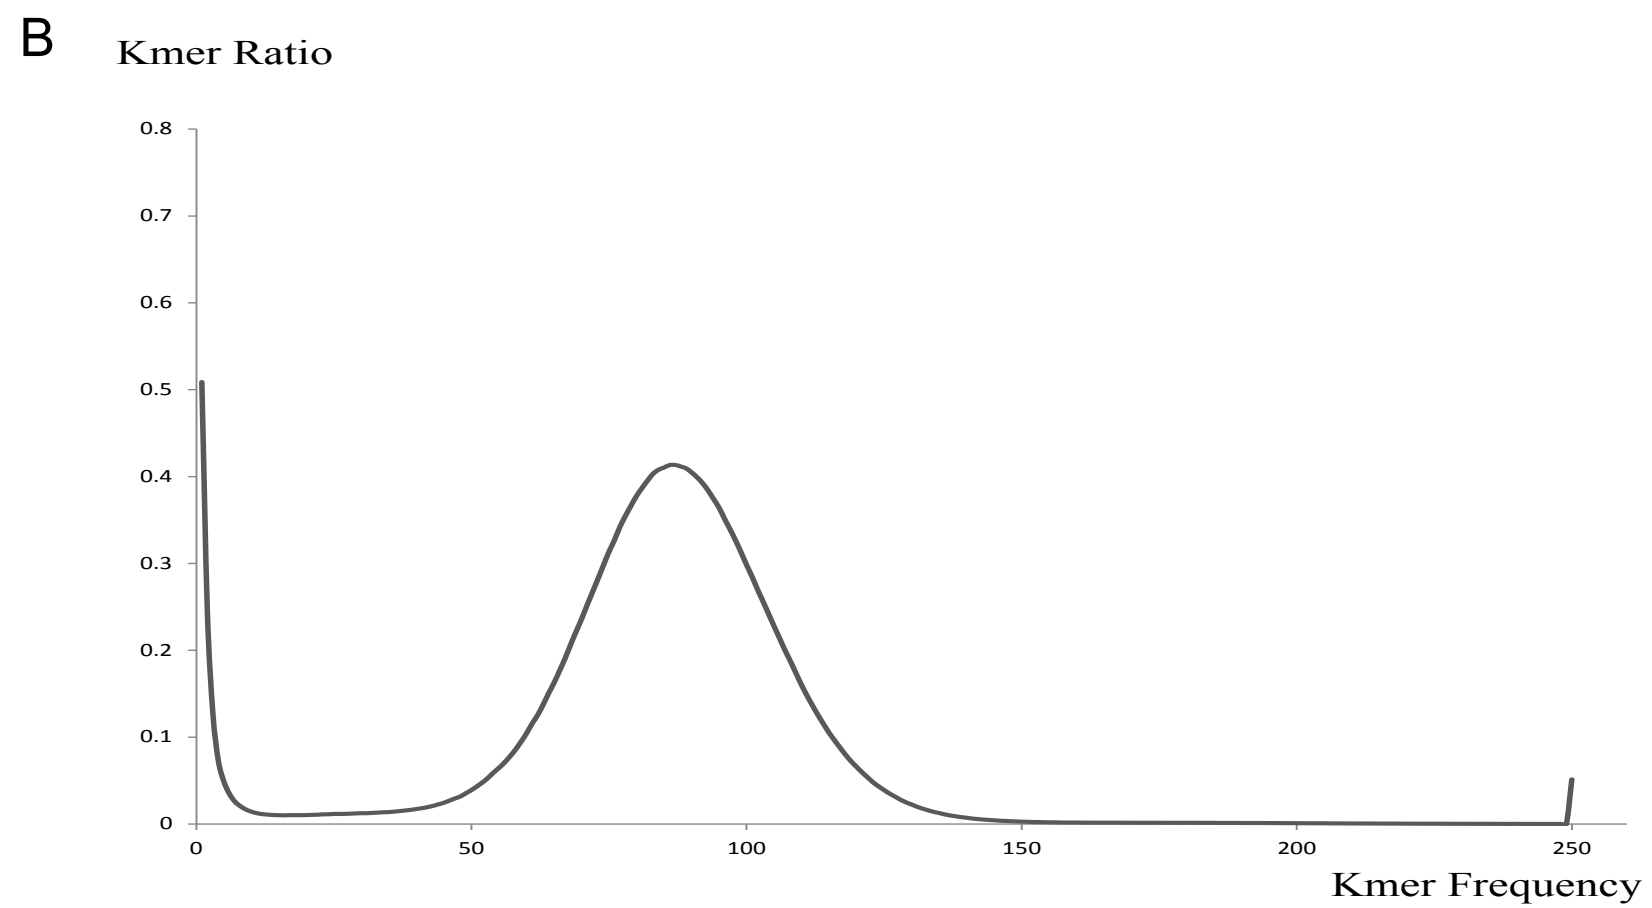

*A. alternata*  
Insert length = 694bp
