# Supplementary material for: Comparative Genomics of Pathogens Causing Brown Spot Disease of Tobacco: Alternaria longipes and Alternaria alternata
Source: PubMed Central journal article supplement (PMC4861331; doi:10.1371/journal.pone.0155258), 2016-05-09
Supplement: pone.0155258.s002.pdf [file pone.0155258.s002.pdf]

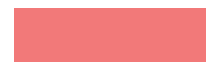

AaMSAS

scaffold 266

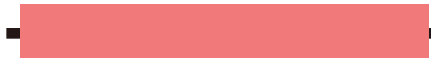

AL\_scaffold266\_5850

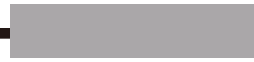

AL\_scaffold266\_5849

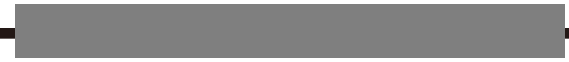

AL\_scaffold266\_5851

19 Kb

scaffold 337

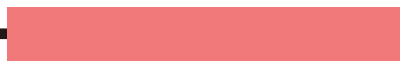

AL\_scaffold337\_4970

11 Kb
