# Supplementary material for: Comparative Genomics of Pathogens Causing Brown Spot Disease of Tobacco: Alternaria longipes and Alternaria alternata
Source: PLoS One. 2016 May 9;11(5):e0155258. doi: 10.1371/journal.pone.0155258 (PMC4861331; doi:10.1371/journal.pone.0155258)
Supplement: S5 Table — (XLSX) [file pone.0155258.s007.xlsx]

## Sheet: Sheet1
S5 Table. Gene families only shared by A. longipes cx1 and A. alternata cx2.
Gene family ID/Gene name	Gene functional annotation
668
AA_scaffold30_2734	hypothetical protein; K01196 glycogen debranching enzyme [EC:2.4.1.25 3.2.1.33]
AL_scaffold178_10754	hypothetical protein; K01196 glycogen debranching enzyme [EC:2.4.1.25 3.2.1.33]
AL_scaffold301_9424	hypothetical protein; K01196 glycogen debranching enzyme [EC:2.4.1.25 3.2.1.33]
AL_scaffold314_7028	B2W5J2_PYRTR Predicted protein OS=Pyrenophora tritici-repentis (strain Pt-1C-BFP) GN=PTRG_04892 PE=4 SV=1
AL_scaffold329_1	hypothetical protein; K01196 glycogen debranching enzyme [EC:2.4.1.25 3.2.1.33]
AL_scaffold481_4249	hypothetical protein; K01196 glycogen debranching enzyme [EC:2.4.1.25 3.2.1.33]
776
AA_scaffold750_2796
AA_scaffold762_2788
AA_scaffold764_170
AL_scaffold3922_6006
AL_scaffold4079_2748
AL_scaffold4122_9084
1120
AA_scaffold30_2725	B2W5J0_PYRTR Predicted protein OS=Pyrenophora tritici-repentis (strain Pt-1C-BFP) GN=PTRG_04890 PE=4 SV=1
AL_scaffold178_10764	B2W5J0_PYRTR Predicted protein OS=Pyrenophora tritici-repentis (strain Pt-1C-BFP) GN=PTRG_04890 PE=4 SV=1
AL_scaffold301_9427	B2W5J0_PYRTR Predicted protein OS=Pyrenophora tritici-repentis (strain Pt-1C-BFP) GN=PTRG_04890 PE=4 SV=1
AL_scaffold301_9428	B2W5J0_PYRTR Predicted protein OS=Pyrenophora tritici-repentis (strain Pt-1C-BFP) GN=PTRG_04890 PE=4 SV=1
AL_scaffold329_3	B2W5J0_PYRTR Predicted protein OS=Pyrenophora tritici-repentis (strain Pt-1C-BFP) GN=PTRG_04890 PE=4 SV=1
1122
AA_scaffold30_2728	B2W5J3_PYRTR Predicted protein OS=Pyrenophora tritici-repentis (strain Pt-1C-BFP) GN=PTRG_04893 PE=4 SV=1
AL_scaffold178_10763	B2W5J3_PYRTR Predicted protein OS=Pyrenophora tritici-repentis (strain Pt-1C-BFP) GN=PTRG_04893 PE=4 SV=1
AL_scaffold301_9429	B2W5J3_PYRTR Predicted protein OS=Pyrenophora tritici-repentis (strain Pt-1C-BFP) GN=PTRG_04893 PE=4 SV=1
AL_scaffold314_7031	B2W5J3_PYRTR Predicted protein OS=Pyrenophora tritici-repentis (strain Pt-1C-BFP) GN=PTRG_04893 PE=4 SV=1
AL_scaffold583_7625	B2W5J3_PYRTR Predicted protein OS=Pyrenophora tritici-repentis (strain Pt-1C-BFP) GN=PTRG_04893 PE=4 SV=1
1123
AA_scaffold30_2732	Pfs, NACHT and WD domain protein (EC:2.4.2.-); K00777[EC:2.4.2.-]
AL_scaffold249_5852	Pfs, NACHT and WD domain protein (EC:2.4.2.-); K00777[EC:2.4.2.-]
AL_scaffold29_2251	Pfs, NACHT and WD domain protein (EC:2.4.2.-); K00777[EC:2.4.2.-]
AL_scaffold325_9746	Pfs, NACHT and WD domain protein (EC:2.4.2.-); K00777[EC:2.4.2.-]
AL_scaffold340_8411	Pfs, NACHT and WD domain protein (EC:2.4.2.-); K00777[EC:2.4.2.-]
1124
AA_scaffold30_2737	B2W5I6_PYRTR Predicted protein OS=Pyrenophora tritici-repentis (strain Pt-1C-BFP) GN=PTRG_04886 PE=4 SV=1
AL_scaffold178_10757	B2W5I6_PYRTR Predicted protein OS=Pyrenophora tritici-repentis (strain Pt-1C-BFP) GN=PTRG_04886 PE=4 SV=1
AL_scaffold193_4009	B2W5I6_PYRTR Predicted protein OS=Pyrenophora tritici-repentis (strain Pt-1C-BFP) GN=PTRG_04886 PE=4 SV=1
AL_scaffold301_9425	B2W5I6_PYRTR Predicted protein OS=Pyrenophora tritici-repentis (strain Pt-1C-BFP) GN=PTRG_04886 PE=4 SV=1
AL_scaffold329_2	B2W5I6_PYRTR Predicted protein OS=Pyrenophora tritici-repentis (strain Pt-1C-BFP) GN=PTRG_04886 PE=4 SV=1
4828
AA_scaffold30_2727	B2W5I0_PYRTR Putative uncharacterized protein OS=Pyrenophora tritici-repentis (strain Pt-1C-BFP) GN=PTRG_04880 PE=4 SV=1
AL_scaffold226_11019	B2WPJ7_PYRTR Putative uncharacterized protein OS=Pyrenophora tritici-repentis (strain Pt-1C-BFP) GN=PTRG_11948 PE=4 SV=1
AL_scaffold276_4080	B2W5I0_PYRTR Putative uncharacterized protein OS=Pyrenophora tritici-repentis (strain Pt-1C-BFP) GN=PTRG_04880 PE=4 SV=1
AL_scaffold292_10020	B2WPJ7_PYRTR Putative uncharacterized protein OS=Pyrenophora tritici-repentis (strain Pt-1C-BFP) GN=PTRG_11948 PE=4 SV=1
8849
AA_scaffold27_18	WSC domain protein (EC:3.2.1.-); K01238[EC:3.2.1.-]
AL_scaffold260_3766	WSC domain protein (EC:3.2.1.-); K01238[EC:3.2.1.-]
AL_scaffold422_673	WSC domain protein (EC:3.2.1.-); K01238[EC:3.2.1.-]
8853
AA_scaffold27_8	E5AC21_LEPMJ Predicted protein OS=Leptosphaeria maculans (strain JN3 / isolate v23.1.3 / race Av1-4-5-6-7-8) GN=LEMA_P023420.1 PE=4 SV=1
AL_scaffold200_5364	E5AC21_LEPMJ Predicted protein OS=Leptosphaeria maculans (strain JN3 / isolate v23.1.3 / race Av1-4-5-6-7-8) GN=LEMA_P023420.1 PE=4 SV=1
AL_scaffold249_5854	E5AC21_LEPMJ Predicted protein OS=Leptosphaeria maculans (strain JN3 / isolate v23.1.3 / race Av1-4-5-6-7-8) GN=LEMA_P023420.1 PE=4 SV=1
9249
AA_scaffold30_2733	B2W5J6_PYRTR Predicted protein OS=Pyrenophora tritici-repentis (strain Pt-1C-BFP) GN=PTRG_04896 PE=4 SV=1
AL_scaffold314_7027	B2W5J6_PYRTR Predicted protein OS=Pyrenophora tritici-repentis (strain Pt-1C-BFP) GN=PTRG_04896 PE=4 SV=1
AL_scaffold367_665	B2W5J6_PYRTR Predicted protein OS=Pyrenophora tritici-repentis (strain Pt-1C-BFP) GN=PTRG_04896 PE=4 SV=1
10406
AA_scaffold10_11367
AL_scaffold5_7121
10407
AA_scaffold10_11368
AL_scaffold5_7122
10409
AA_scaffold10_11437
AL_scaffold5_7201
10410
AA_scaffold10_11438
AL_scaffold5_7202
10411
AA_scaffold10_11452
AL_scaffold5_7217
10412
AA_scaffold10_11466
AL_scaffold5_7233
10413
AA_scaffold10_11478
AL_scaffold5_7249
10414
AA_scaffold10_11479
AL_scaffold5_7250
10417
AA_scaffold10_11546	B2WAE6_PYRTR ATP-dependent DNA helicase PIF1 OS=Pyrenophora tritici-repentis (strain Pt-1C-BFP) GN=PTRG_07259 PE=4 SV=1
AL_scaffold5_7311	B2WAE6_PYRTR ATP-dependent DNA helicase PIF1 OS=Pyrenophora tritici-repentis (strain Pt-1C-BFP) GN=PTRG_07259 PE=4 SV=1
10419
AA_scaffold10_11615
AL_scaffold125_3196
10420
AA_scaffold10_11616
AL_scaffold125_3197
10421
AA_scaffold10_11656	E4ZTB2_LEPMJ Putative uncharacterized protein OS=Leptosphaeria maculans (strain JN3 / isolate v23.1.3 / race Av1-4-5-6-7-8) GN=LEMA_P117710.1 PE=4 SV=1
AL_scaffold35_8333	E4ZTB2_LEPMJ Putative uncharacterized protein OS=Leptosphaeria maculans (strain JN3 / isolate v23.1.3 / race Av1-4-5-6-7-8) GN=LEMA_P117710.1 PE=4 SV=1
10422
AA_scaffold10_11670
AL_scaffold35_8358
10425
AA_scaffold10_11754
AL_scaffold14_5976
10426
AA_scaffold10_11775	E3RXP5_PYRTT Putative uncharacterized protein OS=Pyrenophora teres f. teres (strain 0-1) GN=PTT_14201 PE=4 SV=1
AL_scaffold14_6001	E3RXP5_PYRTT Putative uncharacterized protein OS=Pyrenophora teres f. teres (strain 0-1) GN=PTT_14201 PE=4 SV=1
10427
AA_scaffold118_11350	C6JS04_SORBI Putative uncharacterized protein Sb0016s002240 (Fragment) OS=Sorghum bicolor GN=Sb0016s002240 PE=4 SV=1
AL_scaffold849_6009	E4ZYE6_LEPMJ Predicted protein OS=Leptosphaeria maculans (strain JN3 / isolate v23.1.3 / race Av1-4-5-6-7-8) GN=LEMA_P113100.1 PE=4 SV=1
10428
AA_scaffold11_2811
AL_scaffold52_9890
10429
AA_scaffold11_2822	E5AC54_LEPMJ Predicted protein OS=Leptosphaeria maculans (strain JN3 / isolate v23.1.3 / race Av1-4-5-6-7-8) GN=LEMA_P012950.1 PE=4 SV=1
AL_scaffold52_9910	E5AC54_LEPMJ Predicted protein OS=Leptosphaeria maculans (strain JN3 / isolate v23.1.3 / race Av1-4-5-6-7-8) GN=LEMA_P012950.1 PE=4 SV=1
10430
AA_scaffold11_2827
AL_scaffold52_9925
10433
AA_scaffold11_2867
AL_scaffold52_9926
10434
AA_scaffold11_2868
AL_scaffold52_9927
10435
AA_scaffold11_2894	E3RKA9_PYRTT Putative uncharacterized protein OS=Pyrenophora teres f. teres (strain 0-1) GN=PTT_08657 PE=4 SV=1
AL_scaffold18_10256	E3RKA9_PYRTT Putative uncharacterized protein OS=Pyrenophora teres f. teres (strain 0-1) GN=PTT_08657 PE=4 SV=1
10436
AA_scaffold11_2912
AL_scaffold18_10238
10437
AA_scaffold11_2931
AL_scaffold18_10262
10438
AA_scaffold11_2965
AL_scaffold18_10225
10442
AA_scaffold11_3032
AL_scaffold18_10134
10443
AA_scaffold11_3041	A9JXB1_PHANO Putative uncharacterized protein OS=Phaeosphaeria nodorum (strain SN15 / ATCC MYA-4574 / FGSC 10173) GN=SNOG_20115 PE=4 SV=1
AL_scaffold18_10143	A9JXB1_PHANO Putative uncharacterized protein OS=Phaeosphaeria nodorum (strain SN15 / ATCC MYA-4574 / FGSC 10173) GN=SNOG_20115 PE=4 SV=1
10444
AA_scaffold11_3053
AL_scaffold18_10136
10445
AA_scaffold11_3054
AL_scaffold18_10137
10446
AA_scaffold11_3061	eukaryotic translation initiation factor eIF-4A subunit, putative; K13025 ATP-dependent RNA helicase [EC:3.6.4.13]
AL_scaffold55_9043	eukaryotic translation initiation factor eIF-4A subunit, putative; K13025 ATP-dependent RNA helicase [EC:3.6.4.13]
10447
AA_scaffold11_3122
AL_scaffold55_9026
10452
AA_scaffold11_3281
AL_scaffold46_6401
10453
AA_scaffold11_3333
AL_scaffold32_11705
10455
AA_scaffold11_3421
AL_scaffold32_11646
10456
AA_scaffold11_3422
AL_scaffold32_11648
10457
AA_scaffold11_3440	E4ZJB0_LEPMJ Predicted protein OS=Leptosphaeria maculans (strain JN3 / isolate v23.1.3 / race Av1-4-5-6-7-8) GN=LEMA_uP070490.1 PE=4 SV=1
AL_scaffold233_3573
10458
AA_scaffold11_3442
AL_scaffold84_3095
10459
AA_scaffold11_3457
AL_scaffold233_3579
10460
AA_scaffold11_3458
AL_scaffold233_3580
10465
AA_scaffold12_4528
AL_scaffold37_6717
10466
AA_scaffold12_4544
AL_scaffold37_6690
10467
AA_scaffold12_4613
AL_scaffold37_6740
10468
AA_scaffold12_4670
AL_scaffold216_3407
10470
AA_scaffold12_4701
AL_scaffold49_5833
10471
AA_scaffold12_4702	hypothetical protein; K09247 heme activator protein 1
AL_scaffold49_5835	hypothetical protein; K09247 heme activator protein 1
10472
AA_scaffold12_4733
AL_scaffold49_5834
10478
AA_scaffold12_4753
AL_scaffold59_5417
10480
AA_scaffold12_4781
AL_scaffold59_5420
10481
AA_scaffold12_4791	E3RQN9_PYRTT Putative uncharacterized protein OS=Pyrenophora teres f. teres (strain 0-1) GN=PTT_11056 PE=4 SV=1
AL_scaffold98_5722	E3RQN9_PYRTT Putative uncharacterized protein OS=Pyrenophora teres f. teres (strain 0-1) GN=PTT_11056 PE=4 SV=1
10484
AA_scaffold13_4843
AL_scaffold113_10098
10485
AA_scaffold13_4861
AL_scaffold113_10087
10486
AA_scaffold13_4863
AL_scaffold113_10100
10488
AA_scaffold13_4922
AL_scaffold65_4244
10489
AA_scaffold13_4923
AL_scaffold83_10357
10491
AA_scaffold13_4963
AL_scaffold83_10356
10492
AA_scaffold13_4970	hypothetical protein ; K00730 oligosaccharyl transferase complex subunit OST4
AL_scaffold83_10340	hypothetical protein ; K00730 oligosaccharyl transferase complex subunit OST4
10493
AA_scaffold13_4988	E4ZM37_LEPMJ Putative uncharacterized protein OS=Leptosphaeria maculans (strain JN3 / isolate v23.1.3 / race Av1-4-5-6-7-8) GN=LEMA_P050920.1 PE=4 SV=1
AL_scaffold215_3016	E4ZM37_LEPMJ Putative uncharacterized protein OS=Leptosphaeria maculans (strain JN3 / isolate v23.1.3 / race Av1-4-5-6-7-8) GN=LEMA_P050920.1 PE=4 SV=1
10494
AA_scaffold13_5027	HET6_NEUCR Heterokaryon incompatibility protein 6, OR allele OS=Neurospora crassa (strain ATCC 24698 / 74-OR23-1A / CBS 708.71 / DSM 1257 / FGSC 987) GN=het-6 PE=4 SV=1
AL_scaffold2_7614	HET6_NEUCR Heterokaryon incompatibility protein 6, OR allele OS=Neurospora crassa (strain ATCC 24698 / 74-OR23-1A / CBS 708.71 / DSM 1257 / FGSC 987) GN=het-6 PE=4 SV=1
10495
AA_scaffold13_5030
AL_scaffold163_10776
10497
AA_scaffold13_5049	HET6_NEUCR Heterokaryon incompatibility protein 6, OR allele OS=Neurospora crassa (strain ATCC 24698 / 74-OR23-1A / CBS 708.71 / DSM 1257 / FGSC 987) GN=het-6 PE=4 SV=1
AL_scaffold163_10783	HET6_NEUCR Heterokaryon incompatibility protein 6, OR allele OS=Neurospora crassa (strain ATCC 24698 / 74-OR23-1A / CBS 708.71 / DSM 1257 / FGSC 987) GN=het-6 PE=4 SV=1
10500
AA_scaffold13_5081	similar to transferase Gpi7; K05310 ethanolaminephosphotransferase [EC:2.7.-.-]
AL_scaffold92_324
10501
AA_scaffold13_5082
AL_scaffold92_325
10515
AA_scaffold14_4281
AL_scaffold122_10387
10516
AA_scaffold14_4299
AL_scaffold122_10373
10517
AA_scaffold14_4301	hypothetical protein; K03283 heat shock 70kDa protein 1/8
AL_scaffold122_10386
10518
AA_scaffold14_4326
AL_scaffold14_5928
10519
AA_scaffold14_4350	GO:0016772; transferase activity, transferring phosphorus-containing groups; molecular_function
AL_scaffold14_5903	GO:0016772; transferase activity, transferring phosphorus-containing groups; molecular_function
10520
AA_scaffold14_4352
AL_scaffold14_5905
10521
AA_scaffold14_4353	Protein kinase domain containing protein (EC:2.7.11.1); K08282 non-specific serine/threonine protein kinase [EC:2.7.11.1]
AL_scaffold14_5907	Protein kinase domain containing protein (EC:2.7.11.1); K08282 non-specific serine/threonine protein kinase [EC:2.7.11.1]
10522
AA_scaffold14_4369
AL_scaffold14_5887
10524
AA_scaffold14_4386
AL_scaffold213_12270
10526
AA_scaffold14_4396	MG09159.4; hypothetical protein; K01452 chitin deacetylase [EC:3.5.1.41]
AL_scaffold213_12276	MG09159.4; hypothetical protein; K01452 chitin deacetylase [EC:3.5.1.41]
10528
AA_scaffold14_4405
AL_scaffold156_4776	B2VWX4_PYRTR Putative uncharacterized protein OS=Pyrenophora tritici-repentis (strain Pt-1C-BFP) GN=PTRG_01686 PE=4 SV=1
10529
AA_scaffold14_4407
AL_scaffold156_4773
10530
AA_scaffold14_4408
AL_scaffold203_3397
10532
AA_scaffold14_4433	NmrA-like family protein (EC:1.3.1.-); K00224[EC:1.3.1.-]
AL_scaffold317_11331	NmrA-like family protein (EC:1.3.1.-); K00224[EC:1.3.1.-]
10533
AA_scaffold14_4436
AL_scaffold189_12162
10539
AA_scaffold14_4470	E5ACD4_LEPMJ Putative uncharacterized protein OS=Leptosphaeria maculans (strain JN3 / isolate v23.1.3 / race Av1-4-5-6-7-8) GN=LEMA_P009230.1 PE=4 SV=1
AL_scaffold317_11332	E5ACD4_LEPMJ Putative uncharacterized protein OS=Leptosphaeria maculans (strain JN3 / isolate v23.1.3 / race Av1-4-5-6-7-8) GN=LEMA_P009230.1 PE=4 SV=1
10540
AA_scaffold14_4471
AL_scaffold317_11329
10542
AA_scaffold15_11791	E3RHR5_PYRTT Putative uncharacterized protein OS=Pyrenophora teres f. teres (strain 0-1) GN=PTT_07486 PE=3 SV=1
AL_scaffold57_1052	E3RHR5_PYRTT Putative uncharacterized protein OS=Pyrenophora teres f. teres (strain 0-1) GN=PTT_07486 PE=3 SV=1
10543
AA_scaffold15_11844
AL_scaffold57_1114
10545
AA_scaffold15_11880
AL_scaffold13_6535
10546
AA_scaffold15_11919
AL_scaffold13_6572
10548
AA_scaffold15_11966
AL_scaffold13_6602
10549
AA_scaffold15_11967
AL_scaffold13_6603
10552
AA_scaffold15_11993
AL_scaffold13_6638
10553
AA_scaffold15_12016
AL_scaffold15_12581
10556
AA_scaffold15_12037
AL_scaffold238_2220
10557
AA_scaffold15_12039
AL_scaffold15_12587
10558
AA_scaffold16_11124	Q5FBF5_9HYPO Putative uncharacterized protein (Fragment) OS=Nectria rigidiuscula PE=4 SV=1
AL_scaffold16_11282	Q5FBF5_9HYPO Putative uncharacterized protein (Fragment) OS=Nectria rigidiuscula PE=4 SV=1
10559
AA_scaffold16_11129
AL_scaffold16_11238
10561
AA_scaffold16_11149
AL_scaffold16_11251
10562
AA_scaffold16_11188
AL_scaffold16_11218
10565
AA_scaffold16_11206
AL_scaffold16_11200
10568
AA_scaffold16_11229
AL_scaffold11_4331
10569
AA_scaffold16_11230
AL_scaffold11_4332
10570
AA_scaffold16_11265
AL_scaffold11_4415
10571
AA_scaffold16_11314
AL_scaffold11_4411
10572
AA_scaffold17_9008
AL_scaffold50_5523
10575
AA_scaffold17_9068
AL_scaffold50_5486
10576
AA_scaffold17_9105	short-chain dehydrogenase/reductase (EC:1.1.1.-); K00100[EC:1.1.1.-]
AL_scaffold114_10944	short-chain dehydrogenase/reductase (EC:1.1.1.-); K00100[EC:1.1.1.-]
10580
AA_scaffold17_9145	E3S0W6_PYRTT Putative uncharacterized protein OS=Pyrenophora teres f. teres (strain 0-1) GN=PTT_15758 PE=4 SV=1
AL_scaffold62_11795	E3S0W6_PYRTT Putative uncharacterized protein OS=Pyrenophora teres f. teres (strain 0-1) GN=PTT_15758 PE=4 SV=1
10582
AA_scaffold17_9184	hypothetical protein; K07126
AL_scaffold332_3763	ankyrin; K06867
10584
AA_scaffold17_9204	D4AKI8_ARTBC Putative uncharacterized protein OS=Arthroderma benhamiae (strain ATCC MYA-4681 / CBS 112371) GN=ARB_04831 PE=4 SV=1
AL_scaffold62_11842	D4AKI8_ARTBC Putative uncharacterized protein OS=Arthroderma benhamiae (strain ATCC MYA-4681 / CBS 112371) GN=ARB_04831 PE=4 SV=1
10587
AA_scaffold18_10168	E3RWT7_PYRTT Putative uncharacterized protein OS=Pyrenophora teres f. teres (strain 0-1) GN=PTT_13785 PE=4 SV=1
AL_scaffold128_12018
10589
AA_scaffold18_10183	Q0U6S1_PHANO Putative uncharacterized protein OS=Phaeosphaeria nodorum (strain SN15 / ATCC MYA-4574 / FGSC 10173) GN=SNOG_12543 PE=4 SV=1
AL_scaffold131_10992	Q0U6S1_PHANO Putative uncharacterized protein OS=Phaeosphaeria nodorum (strain SN15 / ATCC MYA-4574 / FGSC 10173) GN=SNOG_12543 PE=4 SV=1
10590
AA_scaffold18_10185	U586_DROME UPF0586 protein CG11596 OS=Drosophila melanogaster GN=CG11596 PE=1 SV=1
AL_scaffold131_10994	melC1; tyrosinase; K00505 tyrosinase [EC:1.14.18.1]
10591
AA_scaffold18_10186	Q0U6S3_PHANO Putative uncharacterized protein OS=Phaeosphaeria nodorum (strain SN15 / ATCC MYA-4574 / FGSC 10173) GN=SNOG_12541 PE=4 SV=1
AL_scaffold131_10993	Q0U6S3_PHANO Putative uncharacterized protein OS=Phaeosphaeria nodorum (strain SN15 / ATCC MYA-4574 / FGSC 10173) GN=SNOG_12541 PE=4 SV=1
10592
AA_scaffold18_10191
AL_scaffold131_10997
10594
AA_scaffold18_10205
AL_scaffold131_11007
10596
AA_scaffold18_10239
AL_scaffold42_9826
10597
AA_scaffold18_10258	E5A967_LEPMJ Predicted protein OS=Leptosphaeria maculans (strain JN3 / isolate v23.1.3 / race Av1-4-5-6-7-8) GN=LEMA_P013380.1 PE=4 SV=1
AL_scaffold78_11945	E5A967_LEPMJ Predicted protein OS=Leptosphaeria maculans (strain JN3 / isolate v23.1.3 / race Av1-4-5-6-7-8) GN=LEMA_P013380.1 PE=4 SV=1
10598
AA_scaffold18_10287
AL_scaffold78_11984
10600
AA_scaffold19_7824	HET6_NEUCR Heterokaryon incompatibility protein 6, OR allele OS=Neurospora crassa (strain ATCC 24698 / 74-OR23-1A / CBS 708.71 / DSM 1257 / FGSC 987) GN=het-6 PE=4 SV=1
AL_scaffold154_9066	E4ZJZ4_LEPMJ Putative uncharacterized protein OS=Leptosphaeria maculans (strain JN3 / isolate v23.1.3 / race Av1-4-5-6-7-8) GN=LEMA_P069370.1 PE=4 SV=1
10604
AA_scaffold19_7841	GO:0003677; DNA binding; molecular_function
AL_scaffold154_9072	GO:0003677; DNA binding; molecular_function
10605
AA_scaffold19_7842	hypothetical protein; K13095 splicing factor 1
AL_scaffold154_9079	B2WPR0_PYRTR Putative uncharacterized protein OS=Pyrenophora tritici-repentis (strain Pt-1C-BFP) GN=PTRG_11927 PE=4 SV=1
10618
AA_scaffold1_1114
AL_scaffold158_6371
10621
AA_scaffold1_1149	Q0TXQ9_PHANO Putative uncharacterized protein OS=Phaeosphaeria nodorum (strain SN15 / ATCC MYA-4574 / FGSC 10173) GN=SNOG_15820 PE=4 SV=1
AL_scaffold96_8103
10622
AA_scaffold1_1150
AL_scaffold96_8125
10624
AA_scaffold1_1191
AL_scaffold103_11456
10625
AA_scaffold1_1198	B2WDW3_PYRTR Predicted protein OS=Pyrenophora tritici-repentis (strain Pt-1C-BFP) GN=PTRG_08336 PE=4 SV=1
AL_scaffold26_4922	B2WDW3_PYRTR Predicted protein OS=Pyrenophora tritici-repentis (strain Pt-1C-BFP) GN=PTRG_08336 PE=4 SV=1
10626
AA_scaffold1_1211
AL_scaffold49_5837
10627
AA_scaffold1_1220	Q0UL04_PHANO Putative uncharacterized protein OS=Phaeosphaeria nodorum (strain SN15 / ATCC MYA-4574 / FGSC 10173) GN=SNOG_07560 PE=4 SV=1
AL_scaffold26_4897	Q0UL04_PHANO Putative uncharacterized protein OS=Phaeosphaeria nodorum (strain SN15 / ATCC MYA-4574 / FGSC 10173) GN=SNOG_07560 PE=4 SV=1
10628
AA_scaffold1_1229	HET6_NEUCR Heterokaryon incompatibility protein 6, OR allele OS=Neurospora crassa (strain ATCC 24698 / 74-OR23-1A / CBS 708.71 / DSM 1257 / FGSC 987) GN=het-6 PE=4 SV=1
AL_scaffold26_4915	HET6_NEUCR Heterokaryon incompatibility protein 6, OR allele OS=Neurospora crassa (strain ATCC 24698 / 74-OR23-1A / CBS 708.71 / DSM 1257 / FGSC 987) GN=het-6 PE=4 SV=1
10629
AA_scaffold1_1230
AL_scaffold26_4916
10630
AA_scaffold1_1248	LYRM5_TAEGU LYR motif-containing protein 5 OS=Taeniopygia guttata GN=LYRM5 PE=3 SV=1
AL_scaffold26_4945	LYM5B_DANRE LYR motif-containing protein 5B OS=Danio rerio GN=lyrm5b PE=3 SV=1
10633
AA_scaffold1_1286	GO:0008270; zinc ion binding; molecular_function
AL_scaffold34_8982	E5A312_LEPMJ Putative uncharacterized protein OS=Leptosphaeria maculans (strain JN3 / isolate v23.1.3 / race Av1-4-5-6-7-8) GN=LEMA_P094340.1 PE=4 SV=1
10635
AA_scaffold1_1321
AL_scaffold34_8979
10638
AA_scaffold1_1340
AL_scaffold34_8952
10639
AA_scaffold1_1341
AL_scaffold34_8953
10640
AA_scaffold1_1362
AL_scaffold34_8891
10641
AA_scaffold1_1363
AL_scaffold34_8893
10643
AA_scaffold1_1380
AL_scaffold34_8925
10644
AA_scaffold1_1411
AL_scaffold34_8847
10647
AA_scaffold1_1479	E5A3N2_LEPMJ Predicted protein OS=Leptosphaeria maculans (strain JN3 / isolate v23.1.3 / race Av1-4-5-6-7-8) GN=LEMA_uP096540.1 PE=4 SV=1
AL_scaffold7_9584	E5A3N2_LEPMJ Predicted protein OS=Leptosphaeria maculans (strain JN3 / isolate v23.1.3 / race Av1-4-5-6-7-8) GN=LEMA_uP096540.1 PE=4 SV=1
10648
AA_scaffold1_1496	A9JXC9_PHANO Putative uncharacterized protein OS=Phaeosphaeria nodorum (strain SN15 / ATCC MYA-4574 / FGSC 10173) GN=SNOG_20133 PE=4 SV=1
AL_scaffold7_9572	A9JXC9_PHANO Putative uncharacterized protein OS=Phaeosphaeria nodorum (strain SN15 / ATCC MYA-4574 / FGSC 10173) GN=SNOG_20133 PE=4 SV=1
10649
AA_scaffold1_1512
AL_scaffold7_9545
10650
AA_scaffold1_1513
AL_scaffold7_9547
10651
AA_scaffold1_1514
AL_scaffold7_9564
10652
AA_scaffold1_1551
AL_scaffold7_9543
10653
AA_scaffold1_1552
AL_scaffold7_9544
10654
AA_scaffold1_1570
AL_scaffold7_9521
10655
AA_scaffold1_1592
AL_scaffold7_9505
10656
AA_scaffold1_1593
AL_scaffold7_9506
10657
AA_scaffold1_1629
AL_scaffold1_1790
10658
AA_scaffold1_1652
AL_scaffold1_1754
10659
AA_scaffold1_1670
AL_scaffold1_1789
10660
AA_scaffold1_1673
AL_scaffold1_1756
10661
AA_scaffold1_1705	hypothetical protein; K03860 phosphatidylinositol glycan, class Q
AL_scaffold1_1737	hypothetical protein; K03860 phosphatidylinositol glycan, class Q
10663
AA_scaffold1_1742
AL_scaffold1_1701
10664
AA_scaffold1_1765
AL_scaffold1_1681
10665
AA_scaffold1_1785
AL_scaffold1_1663
10667
AA_scaffold1_180
AL_scaffold23_10808
10668
AA_scaffold1_1816
AL_scaffold1_1591
10669
AA_scaffold1_1821
AL_scaffold1_1613
10670
AA_scaffold1_1838
AL_scaffold1_1606
10673
AA_scaffold1_1937
AL_scaffold1_1539
10674
AA_scaffold1_194
AL_scaffold341_3846
10675
AA_scaffold1_1956
AL_scaffold1_1497
10676
AA_scaffold1_1957
AL_scaffold1_1455
10677
AA_scaffold1_195
AL_scaffold23_10824
10680
AA_scaffold1_1985
AL_scaffold1_1435
10681
AA_scaffold1_1986
AL_scaffold1_1475
10682
AA_scaffold1_2007
AL_scaffold1_1456
10683
AA_scaffold1_2039
AL_scaffold339_3705
10684
AA_scaffold1_2040
AL_scaffold1_1412
10685
AA_scaffold1_2066
AL_scaffold145_6785
10686
AA_scaffold1_215
AL_scaffold23_10807
10688
AA_scaffold1_280
AL_scaffold23_10880
10689
AA_scaffold1_291	A9JX14_PHANO Putative uncharacterized protein OS=Phaeosphaeria nodorum (strain SN15 / ATCC MYA-4574 / FGSC 10173) GN=SNOG_20017 PE=4 SV=1
AL_scaffold15_12582	A9JX14_PHANO Putative uncharacterized protein OS=Phaeosphaeria nodorum (strain SN15 / ATCC MYA-4574 / FGSC 10173) GN=SNOG_20017 PE=4 SV=1
10694
AA_scaffold1_351
AL_scaffold15_12651
10695
AA_scaffold1_352
AL_scaffold15_12650
10696
AA_scaffold1_368
AL_scaffold15_12681
10698
AA_scaffold1_371
AL_scaffold15_12683
10699
AA_scaffold1_372
AL_scaffold15_12685
10703
AA_scaffold1_427	hypothetical protein; K01613 phosphatidylserine decarboxylase [EC:4.1.1.65]
AL_scaffold20_7901	E5A4J5_LEPMJ Putative uncharacterized protein OS=Leptosphaeria maculans (strain JN3 / isolate v23.1.3 / race Av1-4-5-6-7-8) GN=LEMA_P077820.1 PE=4 SV=1
10705
AA_scaffold1_470
AL_scaffold20_7904
10706
AA_scaffold1_491
AL_scaffold20_7864
10708
AA_scaffold1_523
AL_scaffold20_7865
10709
AA_scaffold1_543
AL_scaffold20_7792
10710
AA_scaffold1_566
AL_scaffold20_7794
10712
AA_scaffold1_580
AL_scaffold20_7754
10714
AA_scaffold1_600
AL_scaffold20_7736
10716
AA_scaffold1_636
AL_scaffold20_7737
10718
AA_scaffold1_671
AL_scaffold253_943
10719
AA_scaffold1_691
AL_scaffold82_1273
10720
AA_scaffold1_692
AL_scaffold152_299
10721
AA_scaffold1_712
AL_scaffold82_1254
10722
AA_scaffold1_740
AL_scaffold152_290
10725
AA_scaffold1_768
AL_scaffold58_1935
10726
AA_scaffold1_769
AL_scaffold58_1937
10727
AA_scaffold1_772
AL_scaffold58_1938
10729
AA_scaffold1_777
AL_scaffold58_1963
10730
AA_scaffold1_778
AL_scaffold58_1962
10731
AA_scaffold1_794
AL_scaffold118_11614
10732
AA_scaffold1_814
AL_scaffold118_11598
10739
AA_scaffold1_945
AL_scaffold85_4757
10740
AA_scaffold1_946
AL_scaffold85_4758
10741
AA_scaffold1_958	protein kinase (EC:2.7.11.1); K08282 non-specific serine/threonine protein kinase [EC:2.7.11.1]
AL_scaffold356_8296	protein kinase (EC:2.7.11.1); K08282 non-specific serine/threonine protein kinase [EC:2.7.11.1]
10742
AA_scaffold1_959	Q0U3A7_PHANO Putative uncharacterized protein OS=Phaeosphaeria nodorum (strain SN15 / ATCC MYA-4574 / FGSC 10173) GN=SNOG_13757 PE=4 SV=1
AL_scaffold162_395	Q0U3A7_PHANO Putative uncharacterized protein OS=Phaeosphaeria nodorum (strain SN15 / ATCC MYA-4574 / FGSC 10173) GN=SNOG_13757 PE=4 SV=1
10743
AA_scaffold1_965
AL_scaffold162_398
10744
AA_scaffold1_966
AL_scaffold116_5553
10747
AA_scaffold20_7695	GO:0016021; integral to membrane; cellular_component
AL_scaffold39_12035	GO:0016021; integral to membrane; cellular_component
10748
AA_scaffold20_7719	GO:0030001; metal ion transport; biological_process
AL_scaffold39_12065	Q0UU24_PHANO Putative uncharacterized protein OS=Phaeosphaeria nodorum (strain SN15 / ATCC MYA-4574 / FGSC 10173) GN=SNOG_04740 PE=4 SV=1
10750
AA_scaffold20_7775
AL_scaffold16_11314
10751
AA_scaffold20_7776
AL_scaffold39_12105
10752
AA_scaffold20_7777
AL_scaffold16_11315
10753
AA_scaffold20_7798	alpha/beta hydrolase fold protein; K01563 haloalkane dehalogenase [EC:3.8.1.5]
AL_scaffold39_12122	alpha/beta hydrolase fold protein; K01563 haloalkane dehalogenase [EC:3.8.1.5]
10755
AA_scaffold21_7962	GO:0016021; integral to membrane; cellular_component
AL_scaffold354_11873	GO:0016021; integral to membrane; cellular_component
10757
AA_scaffold21_7986	dyn1; dynamin-like protein; K01528 dynamin GTPase [EC:3.6.5.5]
AL_scaffold159_9950	dyn1; dynamin-like protein; K01528 dynamin GTPase [EC:3.6.5.5]
10760
AA_scaffold21_8013
AL_scaffold87_934
10762
AA_scaffold21_8075	HET6_NEUCR Heterokaryon incompatibility protein 6, OR allele OS=Neurospora crassa (strain ATCC 24698 / 74-OR23-1A / CBS 708.71 / DSM 1257 / FGSC 987) GN=het-6 PE=4 SV=1
AL_scaffold107_9985	HET6_NEUCR Heterokaryon incompatibility protein 6, OR allele OS=Neurospora crassa (strain ATCC 24698 / 74-OR23-1A / CBS 708.71 / DSM 1257 / FGSC 987) GN=het-6 PE=4 SV=1
10766
AA_scaffold21_8102
AL_scaffold87_931
10770
AA_scaffold22_58	B2W3E2_PYRTR Putative uncharacterized protein OS=Pyrenophora tritici-repentis (strain Pt-1C-BFP) GN=PTRG_04992 PE=4 SV=1
AL_scaffold136_9703	B2W3E2_PYRTR Putative uncharacterized protein OS=Pyrenophora tritici-repentis (strain Pt-1C-BFP) GN=PTRG_04992 PE=4 SV=1
10771
AA_scaffold22_95
AL_scaffold9_4625
10775
AA_scaffold23_11008
AL_scaffold164_11181
10781
AA_scaffold23_11062
AL_scaffold194_11065
10783
AA_scaffold23_11090
AL_scaffold194_11063
10784
AA_scaffold23_11094
AL_scaffold229_11782
10785
AA_scaffold24_4079	hypothetical protein; K07393 putative glutathione S-transferase
AL_scaffold100_8257	hypothetical protein; K07393 putative glutathione S-transferase
10786
AA_scaffold24_4082	hypothetical protein; K00801 farnesyl-diphosphate farnesyltransferase [EC:2.5.1.21]
AL_scaffold100_8261	hypothetical protein; K00801 farnesyl-diphosphate farnesyltransferase [EC:2.5.1.21]
10793
AA_scaffold24_4129	E5R5B0_LEPMJ Predicted protein OS=Leptosphaeria maculans (strain JN3 / isolate v23.1.3 / race Av1-4-5-6-7-8) GN=LEMA_P047860.1 PE=4 SV=1
AL_scaffold100_8266	E5R5B0_LEPMJ Predicted protein OS=Leptosphaeria maculans (strain JN3 / isolate v23.1.3 / race Av1-4-5-6-7-8) GN=LEMA_P047860.1 PE=4 SV=1
10799
AA_scaffold25_2754	B2W7K1_PYRTR Putative uncharacterized protein OS=Pyrenophora tritici-repentis (strain Pt-1C-BFP) GN=PTRG_05789 PE=4 SV=1
AL_scaffold62_11845	B2W7K1_PYRTR Putative uncharacterized protein OS=Pyrenophora tritici-repentis (strain Pt-1C-BFP) GN=PTRG_05789 PE=4 SV=1
10803
AA_scaffold26_4065	Q0U9F6_PHANO Putative uncharacterized protein OS=Phaeosphaeria nodorum (strain SN15 / ATCC MYA-4574 / FGSC 10173) GN=SNOG_11608 PE=4 SV=1
AL_scaffold9_4492	E5A256_LEPMJ Predicted protein OS=Leptosphaeria maculans (strain JN3 / isolate v23.1.3 / race Av1-4-5-6-7-8) GN=LEMA_uP093420.1 PE=4 SV=1
10804
AA_scaffold26_4066	GO:0008270; zinc ion binding; molecular_function
AL_scaffold9_4507	GO:0008270; zinc ion binding; molecular_function
10805
AA_scaffold26_4068
AL_scaffold9_4508
10808
AA_scaffold27_19	TPR repeat-containing serine/threonin protein kinase; K08282 non-specific serine/threonine protein kinase [EC:2.7.11.1]
AL_scaffold320_77	GO:0005515; protein binding; molecular_function
10809
AA_scaffold27_21	C9K7E7_ALTAL Gag-like protein OS=Alternaria alternata PE=4 SV=1
AL_scaffold289_6656	B2WQ08_PYRTR Putative uncharacterized protein OS=Pyrenophora tritici-repentis (strain Pt-1C-BFP) GN=PTRG_12076 PE=4 SV=1
10810
AA_scaffold27_23	B2WGZ9_PYRTR Predicted protein OS=Pyrenophora tritici-repentis (strain Pt-1C-BFP) GN=PTRG_09258 PE=4 SV=1
AL_scaffold249_5855	B2WGZ9_PYRTR Predicted protein OS=Pyrenophora tritici-repentis (strain Pt-1C-BFP) GN=PTRG_09258 PE=4 SV=1
10813
AA_scaffold27_6	B2W5K0_PYRTR Predicted protein OS=Pyrenophora tritici-repentis (strain Pt-1C-BFP) GN=PTRG_04900 PE=4 SV=1
AL_scaffold422_674	B2W5K0_PYRTR Predicted protein OS=Pyrenophora tritici-repentis (strain Pt-1C-BFP) GN=PTRG_04900 PE=4 SV=1
10815
AA_scaffold28_2706
AL_scaffold140_878
10817
AA_scaffold28_2723	GO:0003677; DNA binding; molecular_function
AL_scaffold288_3009
10819
AA_scaffold2_6296	B2W7H1_PYRTR Predicted protein OS=Pyrenophora tritici-repentis (strain Pt-1C-BFP) GN=PTRG_05759 PE=4 SV=1
AL_scaffold127_2978	B2W7H1_PYRTR Predicted protein OS=Pyrenophora tritici-repentis (strain Pt-1C-BFP) GN=PTRG_05759 PE=4 SV=1
10820
AA_scaffold2_6297
AL_scaffold127_2981
10821
AA_scaffold2_6340
AL_scaffold126_11086
10823
AA_scaffold2_6361
AL_scaffold153_11762
10824
AA_scaffold2_6363	E3S668_PYRTT Putative uncharacterized protein OS=Pyrenophora teres f. teres (strain 0-1) GN=PTT_18188 PE=4 SV=1
AL_scaffold108_3713	E3S668_PYRTT Putative uncharacterized protein OS=Pyrenophora teres f. teres (strain 0-1) GN=PTT_18188 PE=4 SV=1
10826
AA_scaffold2_6394	GO:0008061; chitin binding; molecular_function
AL_scaffold108_3743
10828
AA_scaffold2_6433
AL_scaffold108_3748
10829
AA_scaffold2_6467	hypothetical protein; K02912 large subunit ribosomal protein L32e
AL_scaffold919_78	60S ribosomal protein L32-1; K02912 large subunit ribosomal protein L32e
10830
AA_scaffold2_6471	Pc12g09250; K04567 lysyl-tRNA synthetase, class II [EC:6.1.1.6]
AL_scaffold4_10483	Pc12g09250; K04567 lysyl-tRNA synthetase, class II [EC:6.1.1.6]
10831
AA_scaffold2_6536
AL_scaffold4_10550
10832
AA_scaffold2_6537
AL_scaffold4_10585
10833
AA_scaffold2_6569
AL_scaffold4_10584
10834
AA_scaffold2_6570
AL_scaffold4_10627
10835
AA_scaffold2_6575	E3RTQ7_PYRTT Putative uncharacterized protein OS=Pyrenophora teres f. teres (strain 0-1) GN=PTT_12411 PE=4 SV=1
AL_scaffold4_10633	E3RTQ7_PYRTT Putative uncharacterized protein OS=Pyrenophora teres f. teres (strain 0-1) GN=PTT_12411 PE=4 SV=1
10836
AA_scaffold2_6599
AL_scaffold4_10678
10837
AA_scaffold2_6616
AL_scaffold4_10714
10838
AA_scaffold2_6618
AL_scaffold4_10632
10839
AA_scaffold2_6644
AL_scaffold4_10677
10840
AA_scaffold2_6645
AL_scaffold4_10681
10842
AA_scaffold2_6659
AL_scaffold4_10716
10843
AA_scaffold2_6684
AL_scaffold4_10718
10844
AA_scaffold2_6686
AL_scaffold24_5167
10845
AA_scaffold2_6702
AL_scaffold10_12427
10846
AA_scaffold2_6761
AL_scaffold10_12369
10847
AA_scaffold2_6763
AL_scaffold10_12370
10848
AA_scaffold2_6764
AL_scaffold10_12371
10849
AA_scaffold2_6780
AL_scaffold10_12345
10850
AA_scaffold2_6781
AL_scaffold10_12346
10851
AA_scaffold2_6799	B2WPP1_PYRTR Predicted protein OS=Pyrenophora tritici-repentis (strain Pt-1C-BFP) GN=PTRG_11908 PE=4 SV=1
AL_scaffold10_12325	B2WPP1_PYRTR Predicted protein OS=Pyrenophora tritici-repentis (strain Pt-1C-BFP) GN=PTRG_11908 PE=4 SV=1
10852
AA_scaffold2_6800
AL_scaffold10_12326
10854
AA_scaffold2_6818
AL_scaffold10_12306
10855
AA_scaffold2_6840
AL_scaffold298_9246
10856
AA_scaffold2_6870
AL_scaffold171_8050
10858
AA_scaffold2_6898	class V chitinase (EC:3.2.1.14); K01183 chitinase [EC:3.2.1.14]
AL_scaffold72_5666	class V chitinase (EC:3.2.1.14); K01183 chitinase [EC:3.2.1.14]
10862
AA_scaffold2_6910
AL_scaffold72_5712
10868
AA_scaffold2_6985	GO:0005515; protein binding; molecular_function
AL_scaffold48_3885	Q0V067_PHANO Putative uncharacterized protein OS=Phaeosphaeria nodorum (strain SN15 / ATCC MYA-4574 / FGSC 10173) GN=SNOG_02597 PE=4 SV=2
10869
AA_scaffold2_6993
AL_scaffold48_3905
10871
AA_scaffold2_7018
AL_scaffold48_3866
10873
AA_scaffold2_7071
AL_scaffold36_12229
10874
AA_scaffold2_7093
AL_scaffold36_12256
10875
AA_scaffold2_7094
AL_scaffold36_12257
10877
AA_scaffold2_7168
AL_scaffold110_3315
10879
AA_scaffold2_7197	E3RQC6_PYRTT Putative uncharacterized protein OS=Pyrenophora teres f. teres (strain 0-1) GN=PTT_10906 PE=4 SV=1
AL_scaffold123_8409	E3RQC6_PYRTT Putative uncharacterized protein OS=Pyrenophora teres f. teres (strain 0-1) GN=PTT_10906 PE=4 SV=1
10880
AA_scaffold2_7213
AL_scaffold121_2392
10882
AA_scaffold2_7231	F9XDD1_MYCGM Putative uncharacterized protein OS=Mycosphaerella graminicola (strain CBS 115943 / IPO323) GN=MYCGRDRAFT_81209 PE=4 SV=1
AL_scaffold121_2408	F9XDD1_MYCGM Putative uncharacterized protein OS=Mycosphaerella graminicola (strain CBS 115943 / IPO323) GN=MYCGRDRAFT_81209 PE=4 SV=1
10883
AA_scaffold2_7234
AL_scaffold121_2409
10884
AA_scaffold2_7256
AL_scaffold66_477
10886
AA_scaffold2_7275
AL_scaffold183_3559
10887
AA_scaffold2_7276
AL_scaffold183_3560
10890
AA_scaffold2_7400
AL_scaffold47_4685
10891
AA_scaffold2_7431	exported protease (EC:3.4.-.-); K01423[EC:3.4.-.-]
AL_scaffold47_4657	exported protease (EC:3.4.-.-); K01423[EC:3.4.-.-]
10892
AA_scaffold2_7435	Q0UC31_PHANO Putative uncharacterized protein OS=Phaeosphaeria nodorum (strain SN15 / ATCC MYA-4574 / FGSC 10173) GN=SNOG_10683 PE=4 SV=1
AL_scaffold47_4669	Q0UC31_PHANO Putative uncharacterized protein OS=Phaeosphaeria nodorum (strain SN15 / ATCC MYA-4574 / FGSC 10173) GN=SNOG_10683 PE=4 SV=1
10893
AA_scaffold2_7458
AL_scaffold47_4720
10894
AA_scaffold2_7510
AL_scaffold51_9232
10896
AA_scaffold2_7571
AL_scaffold120_2508
10897
AA_scaffold2_7592
AL_scaffold40_3295
10899
AA_scaffold2_7603	E3RRB1_PYRTT Putative uncharacterized protein OS=Pyrenophora teres f. teres (strain 0-1) GN=PTT_11331 PE=4 SV=1
AL_scaffold40_3248	E3RRB1_PYRTT Putative uncharacterized protein OS=Pyrenophora teres f. teres (strain 0-1) GN=PTT_11331 PE=4 SV=1
10901
AA_scaffold2_7605	B2WLI6_PYRTR Predicted protein OS=Pyrenophora tritici-repentis (strain Pt-1C-BFP) GN=PTRG_10846 PE=4 SV=1
AL_scaffold40_3225	B2WLI6_PYRTR Predicted protein OS=Pyrenophora tritici-repentis (strain Pt-1C-BFP) GN=PTRG_10846 PE=4 SV=1
10902
AA_scaffold2_7608
AL_scaffold40_3268
10906
AA_scaffold2_7655	lipI; putative lipase LipH (EC:3.1.-.-); K01175[EC:3.1.-.-]
AL_scaffold209_10064	esterase/lipase (EC:3.1.1.-); K01066 esterase / lipase [EC:3.1.1.-]
10911
AA_scaffold30_2724	B2W5J5_PYRTR Predicted protein OS=Pyrenophora tritici-repentis (strain Pt-1C-BFP) GN=PTRG_04895 PE=4 SV=1
AL_scaffold314_7030	B2W5J5_PYRTR Predicted protein OS=Pyrenophora tritici-repentis (strain Pt-1C-BFP) GN=PTRG_04895 PE=4 SV=1
10912
AA_scaffold30_2729	ferric-chelate reductase (EC:1.16.1.-); K05920[EC:1.16.1.-]
AL_scaffold512_12551	Pc13g00960; K05920[EC:1.16.1.-]
10913
AA_scaffold30_2730	G2X1C8_VERDV Putative uncharacterized protein OS=Verticillium dahliae (strain VdLs.17 / ATCC MYA-4575 / FGSC 10137) GN=VDAG_04057 PE=4 SV=1
AL_scaffold193_4012	extracellular protein (EC:2.7.7.6); K00960 DNA-directed RNA polymerase [EC:2.7.7.6]
10914
AA_scaffold30_2731	B2W5J7_PYRTR Predicted protein OS=Pyrenophora tritici-repentis (strain Pt-1C-BFP) GN=PTRG_04897 PE=4 SV=1
AL_scaffold512_12550	B2W5J7_PYRTR Predicted protein OS=Pyrenophora tritici-repentis (strain Pt-1C-BFP) GN=PTRG_04897 PE=4 SV=1
10916
AA_scaffold31_2783	nad1; NADH dehydrogenase subunit 1; K03878 NADH dehydrogenase I subunit 1 [EC:1.6.5.3]
AL_scaffold182_2466	nad1; NADH dehydrogenase subunit 1; K03878 NADH dehydrogenase I subunit 1 [EC:1.6.5.3]
10917
AA_scaffold34_8977	nad5; NADH dehydrogenase subunit 5; K03883 NADH dehydrogenase I subunit 5 [EC:1.6.5.3]
AL_scaffold182_2462	nad5; NADH dehydrogenase subunit 5; K03883 NADH dehydrogenase I subunit 5 [EC:1.6.5.3]
10918
AA_scaffold34_8978	NADH dehydrogenase subunit 4-like protein; K03881 NADH dehydrogenase I subunit 4 [EC:1.6.5.3]
AL_scaffold182_2460	NADH dehydrogenase subunit 4-like protein; K03881 NADH dehydrogenase I subunit 4 [EC:1.6.5.3]
10919
AA_scaffold34_8979	RMS5_EMEND Ribosomal protein S5, mitochondrial OS=Emericella nidulans PE=3 SV=1
AL_scaffold182_2457	RMS5_EMEND Ribosomal protein S5, mitochondrial OS=Emericella nidulans PE=3 SV=1
10920
AA_scaffold34_8982
AL_scaffold182_2458
10921
AA_scaffold34_8983	nad2; NADH:ubiquinone oxidoreductase subunit 2; K03879 NADH dehydrogenase I subunit 2 [EC:1.6.5.3]
AL_scaffold182_2461	nad2; NADH:ubiquinone oxidoreductase subunit 2; K03879 NADH dehydrogenase I subunit 2 [EC:1.6.5.3]
10922
AA_scaffold34_8985	GO:0003677; DNA binding; molecular_function
AL_scaffold182_2463	GO:0003677; DNA binding; molecular_function
10923
AA_scaffold34_8986	nad3; NADH dehydrogenase subunit 3; K03880 NADH dehydrogenase I subunit 3 [EC:1.6.5.3]
AL_scaffold182_2464	nad3; NADH dehydrogenase subunit 3; K03880 NADH dehydrogenase I subunit 3 [EC:1.6.5.3]
10924
AA_scaffold34_8987	nad5; NADH dehydrogenase subunit 5; K03883 NADH dehydrogenase I subunit 5 [EC:1.6.5.3]
AL_scaffold182_2465	nad5; NADH dehydrogenase subunit 5; K03883 NADH dehydrogenase I subunit 5 [EC:1.6.5.3]
10926
AA_scaffold39_11351	ART2_YEAST Putative uncharacterized protein ART2 OS=Saccharomyces cerevisiae (strain ATCC 204508 / S288c) GN=ART2 PE=5 SV=1
AL_scaffold431_10973	ART2_YEAST Putative uncharacterized protein ART2 OS=Saccharomyces cerevisiae (strain ATCC 204508 / S288c) GN=ART2 PE=5 SV=1
10927
AA_scaffold39_11352	F8PEB0_SERL9 Putative uncharacterized protein OS=Serpula lacrymans var. lacrymans (strain S7.9) GN=SERLADRAFT_353240 PE=4 SV=1
AL_scaffold431_10971	E4ZYE5_LEPMJ Putative uncharacterized protein OS=Leptosphaeria maculans (strain JN3 / isolate v23.1.3 / race Av1-4-5-6-7-8) GN=LEMA_P113090.1 PE=4 SV=1
10928
AA_scaffold39_11354	E4ZYE9_LEPMJ Predicted protein OS=Leptosphaeria maculans (strain JN3 / isolate v23.1.3 / race Av1-4-5-6-7-8) GN=LEMA_P113130.1 PE=4 SV=1
AL_scaffold463_6644	E4ZYE9_LEPMJ Predicted protein OS=Leptosphaeria maculans (strain JN3 / isolate v23.1.3 / race Av1-4-5-6-7-8) GN=LEMA_P113130.1 PE=4 SV=1
10929
AA_scaffold39_11355	B8LLL2_PICSI Putative uncharacterized protein OS=Picea sitchensis PE=4 SV=1
AL_scaffold1092_2610	E4ZYE3_LEPMJ Putative uncharacterized protein OS=Leptosphaeria maculans (strain JN3 / isolate v23.1.3 / race Av1-4-5-6-7-8) GN=LEMA_P113070.1 PE=4 SV=1
10932
AA_scaffold3_8141
AL_scaffold136_9742
10934
AA_scaffold3_8161
AL_scaffold31_3693
10935
AA_scaffold3_8162
AL_scaffold31_3694
10937
AA_scaffold3_8190	E4ZZG7_LEPMJ Predicted protein OS=Leptosphaeria maculans (strain JN3 / isolate v23.1.3 / race Av1-4-5-6-7-8) GN=LEMA_P098930.1 PE=4 SV=1
AL_scaffold31_3687	E4ZZG7_LEPMJ Predicted protein OS=Leptosphaeria maculans (strain JN3 / isolate v23.1.3 / race Av1-4-5-6-7-8) GN=LEMA_P098930.1 PE=4 SV=1
10940
AA_scaffold3_8273
AL_scaffold129_7680
10945
AA_scaffold3_8328
AL_scaffold33_5277
10947
AA_scaffold3_8381
AL_scaffold33_5358
10948
AA_scaffold3_8383	GO:0008270; zinc ion binding; molecular_function
AL_scaffold33_5360	GO:0008270; zinc ion binding; molecular_function
10949
AA_scaffold3_8478
AL_scaffold8_6975
10950
AA_scaffold3_8492
AL_scaffold8_6958
10951
AA_scaffold3_8511
AL_scaffold8_7021
10954
AA_scaffold3_8547
AL_scaffold8_7016
10957
AA_scaffold3_8615
AL_scaffold21_8190
10959
AA_scaffold3_8638
AL_scaffold21_8221
10960
AA_scaffold3_8651
AL_scaffold21_8241
10961
AA_scaffold3_8652
AL_scaffold21_8242
10963
AA_scaffold3_8672	E3S939_PYRTT Putative uncharacterized protein OS=Pyrenophora teres f. teres (strain 0-1) GN=PTT_19529 PE=4 SV=1
AL_scaffold139_4108	E3S939_PYRTT Putative uncharacterized protein OS=Pyrenophora teres f. teres (strain 0-1) GN=PTT_19529 PE=4 SV=1
10964
AA_scaffold3_8673
AL_scaffold139_4109
10965
AA_scaffold3_8687	GO:0009306; protein secretion; biological_process
AL_scaffold139_4120	GO:0009306; protein secretion; biological_process
10967
AA_scaffold3_8724
AL_scaffold75_9393
10969
AA_scaffold3_8744
AL_scaffold41_6858
10970
AA_scaffold3_8745
AL_scaffold41_6860
10973
AA_scaffold3_8775
AL_scaffold41_6859
10977
AA_scaffold3_8814
AL_scaffold41_6817
10982
AA_scaffold3_8856
AL_scaffold141_1292
10987
AA_scaffold40_2781	HET6_NEUCR Heterokaryon incompatibility protein 6, OR allele OS=Neurospora crassa (strain ATCC 24698 / 74-OR23-1A / CBS 708.71 / DSM 1257 / FGSC 987) GN=het-6 PE=4 SV=1
AL_scaffold9_4537	HET6_NEUCR Heterokaryon incompatibility protein 6, OR allele OS=Neurospora crassa (strain ATCC 24698 / 74-OR23-1A / CBS 708.71 / DSM 1257 / FGSC 987) GN=het-6 PE=4 SV=1
10989
AA_scaffold41_5116	cox1; cytochrome c oxidase subunit 1 (EC:1.9.3.1); K02256 cytochrome c oxidase subunit I [EC:1.9.3.1]
AL_scaffold616_6865	cytochrome c oxidase polypeptide I; K02274 cytochrome c oxidase subunit I [EC:1.9.3.1]
10991
AA_scaffold4_10319	SRAC1_DANRE Protein SERAC1 OS=Danio rerio GN=serac1 PE=3 SV=1
AL_scaffold70_2022	SRAC1_DANRE Protein SERAC1 OS=Danio rerio GN=serac1 PE=3 SV=1
11000
AA_scaffold4_10348	B2W189_PYRTR Predicted protein OS=Pyrenophora tritici-repentis (strain Pt-1C-BFP) GN=PTRG_04224 PE=4 SV=1
AL_scaffold70_2029	B2W189_PYRTR Predicted protein OS=Pyrenophora tritici-repentis (strain Pt-1C-BFP) GN=PTRG_04224 PE=4 SV=1
11001
AA_scaffold4_10351
AL_scaffold169_4988
11003
AA_scaffold4_10380
AL_scaffold86_4842
11005
AA_scaffold4_10382
AL_scaffold86_4841
11006
AA_scaffold4_10439
AL_scaffold119_6211
11007
AA_scaffold4_10460
AL_scaffold99_2355
11008
AA_scaffold4_10461
AL_scaffold119_6230
11009
AA_scaffold4_10478	Q0U615_PHANO Putative uncharacterized protein OS=Phaeosphaeria nodorum (strain SN15 / ATCC MYA-4574 / FGSC 10173) GN=SNOG_12799 PE=4 SV=1
AL_scaffold150_10013	Q0U615_PHANO Putative uncharacterized protein OS=Phaeosphaeria nodorum (strain SN15 / ATCC MYA-4574 / FGSC 10173) GN=SNOG_12799 PE=4 SV=1
11011
AA_scaffold4_10500
AL_scaffold387_1358
11012
AA_scaffold4_10501
AL_scaffold387_1359
11014
AA_scaffold4_10517
AL_scaffold6_2050
11017
AA_scaffold4_10555
AL_scaffold6_2125
11018
AA_scaffold4_10576
AL_scaffold6_2101
11021
AA_scaffold4_10607	hypothetical protein; K03940 NADH dehydrogenase (ubiquinone) Fe-S protein 7 [EC:1.6.5.3 1.6.99.3]
AL_scaffold6_2130	hypothetical protein; K03940 NADH dehydrogenase (ubiquinone) Fe-S protein 7 [EC:1.6.5.3 1.6.99.3]
11022
AA_scaffold4_10623
AL_scaffold6_2157
11023
AA_scaffold4_10642
AL_scaffold6_2182
11024
AA_scaffold4_10679
AL_scaffold68_202
11025
AA_scaffold4_10706
AL_scaffold68_239
11027
AA_scaffold4_10721
AL_scaffold68_203
11028
AA_scaffold4_10723
AL_scaffold77_11378
11029
AA_scaffold4_10724
AL_scaffold68_242
11030
AA_scaffold4_10731	PBP1_YEAST PAB1-binding protein 1 OS=Saccharomyces cerevisiae (strain ATCC 204508 / S288c) GN=PBP1 PE=1 SV=1
AL_scaffold77_11343	PBP1_YEAST PAB1-binding protein 1 OS=Saccharomyces cerevisiae (strain ATCC 204508 / S288c) GN=PBP1 PE=1 SV=1
11031
AA_scaffold4_10740
AL_scaffold77_11354
11033
AA_scaffold4_10757
AL_scaffold77_11375
11034
AA_scaffold4_10777
AL_scaffold19_7924
11036
AA_scaffold4_10814
AL_scaffold19_7957
11037
AA_scaffold4_10815
AL_scaffold19_7958
11038
AA_scaffold4_10819	E3RCK4_PYRTT Putative uncharacterized protein OS=Pyrenophora teres f. teres (strain 0-1) GN=PTT_00552 PE=4 SV=1
AL_scaffold19_7971	B2VRL6_PYRTR Putative uncharacterized protein OS=Pyrenophora tritici-repentis (strain Pt-1C-BFP) GN=PTRG_00098 PE=4 SV=1
11039
AA_scaffold4_10833
AL_scaffold19_7978
11042
AA_scaffold4_10867
AL_scaffold19_8028
11043
AA_scaffold4_10905
AL_scaffold132_2424
11044
AA_scaffold4_10906
AL_scaffold19_8027
11045
AA_scaffold4_10907
AL_scaffold19_8029
11046
AA_scaffold4_10972	B2W6X3_PYRTR Putative uncharacterized protein OS=Pyrenophora tritici-repentis (strain Pt-1C-BFP) GN=PTRG_05561 PE=4 SV=1
AL_scaffold43_3960	B2W6X3_PYRTR Putative uncharacterized protein OS=Pyrenophora tritici-repentis (strain Pt-1C-BFP) GN=PTRG_05561 PE=4 SV=1
11048
AA_scaffold4_10978
AL_scaffold43_3939
11049
AA_scaffold55_8990	E4ZYE6_LEPMJ Predicted protein OS=Leptosphaeria maculans (strain JN3 / isolate v23.1.3 / race Av1-4-5-6-7-8) GN=LEMA_P113100.1 PE=4 SV=1
AL_scaffold431_10972	C1GN63_PARBD Putative uncharacterized protein OS=Paracoccidioides brasiliensis (strain Pb18) GN=PADG_08539 PE=4 SV=1
11050
AA_scaffold5_5691	GO:0008061; chitin binding; molecular_function
AL_scaffold22_1206	MG09159.4; hypothetical protein; K01452 chitin deacetylase [EC:3.5.1.41]
11051
AA_scaffold5_5693
AL_scaffold22_1207
11052
AA_scaffold5_5695
AL_scaffold22_1232
11054
AA_scaffold5_5742
AL_scaffold22_1185
11055
AA_scaffold5_5760
AL_scaffold22_1131
11056
AA_scaffold5_5766	E4ZNQ3_LEPMJ Predicted protein OS=Leptosphaeria maculans (strain JN3 / isolate v23.1.3 / race Av1-4-5-6-7-8) GN=LEMA_uP041730.1 PE=4 SV=1
AL_scaffold22_1190	E4ZNQ3_LEPMJ Predicted protein OS=Leptosphaeria maculans (strain JN3 / isolate v23.1.3 / race Av1-4-5-6-7-8) GN=LEMA_uP041730.1 PE=4 SV=1
11057
AA_scaffold5_5784
AL_scaffold2_7622
11058
AA_scaffold5_5803
AL_scaffold22_1130
11059
AA_scaffold5_5804
AL_scaffold2_7591
11060
AA_scaffold5_5805
AL_scaffold22_1132
11061
AA_scaffold5_5806
AL_scaffold2_7592
11062
AA_scaffold5_5833
AL_scaffold2_7620
11063
AA_scaffold5_5834
AL_scaffold2_7621
11064
AA_scaffold5_5849
AL_scaffold2_7590
11065
AA_scaffold5_5851	B2W7B9_PYRTR Predicted protein OS=Pyrenophora tritici-repentis (strain Pt-1C-BFP) GN=PTRG_05707 PE=4 SV=1
AL_scaffold2_7619	B2W7B9_PYRTR Predicted protein OS=Pyrenophora tritici-repentis (strain Pt-1C-BFP) GN=PTRG_05707 PE=4 SV=1
11066
AA_scaffold5_5872
AL_scaffold2_7570
11069
AA_scaffold5_5927	E3SAQ6_PYRTT Putative uncharacterized protein OS=Pyrenophora teres f. teres (strain 0-1) GN=PTT_20279 PE=4 SV=1
AL_scaffold2_7494	E3SAQ6_PYRTT Putative uncharacterized protein OS=Pyrenophora teres f. teres (strain 0-1) GN=PTT_20279 PE=4 SV=1
11071
AA_scaffold5_6028	Q0V3K6_PHANO Putative uncharacterized protein OS=Phaeosphaeria nodorum (strain SN15 / ATCC MYA-4574 / FGSC 10173) GN=SNOG_01408 PE=4 SV=1
AL_scaffold2_7414	Q0V3K6_PHANO Putative uncharacterized protein OS=Phaeosphaeria nodorum (strain SN15 / ATCC MYA-4574 / FGSC 10173) GN=SNOG_01408 PE=4 SV=1
11072
AA_scaffold5_6030
AL_scaffold2_7383
11073
AA_scaffold5_6073
AL_scaffold2_7344
11074
AA_scaffold5_6086
AL_scaffold2_7359
11075
AA_scaffold5_6098
AL_scaffold2_7345
11077
AA_scaffold5_6162
AL_scaffold256_6763
11087
AA_scaffold6_2163
AL_scaffold44_3492
11088
AA_scaffold6_2182
AL_scaffold44_3509
11091
AA_scaffold6_2215	HET6_NEUCR Heterokaryon incompatibility protein 6, OR allele OS=Neurospora crassa (strain ATCC 24698 / 74-OR23-1A / CBS 708.71 / DSM 1257 / FGSC 987) GN=het-6 PE=4 SV=1
AL_scaffold14_5906	HET6_NEUCR Heterokaryon incompatibility protein 6, OR allele OS=Neurospora crassa (strain ATCC 24698 / 74-OR23-1A / CBS 708.71 / DSM 1257 / FGSC 987) GN=het-6 PE=4 SV=1
11092
AA_scaffold6_2223	HET6_NEUCR Heterokaryon incompatibility protein 6, OR allele OS=Neurospora crassa (strain ATCC 24698 / 74-OR23-1A / CBS 708.71 / DSM 1257 / FGSC 987) GN=het-6 PE=4 SV=1
AL_scaffold44_3548	HET6_NEUCR Heterokaryon incompatibility protein 6, OR allele OS=Neurospora crassa (strain ATCC 24698 / 74-OR23-1A / CBS 708.71 / DSM 1257 / FGSC 987) GN=het-6 PE=4 SV=1
11093
AA_scaffold6_2226	FAD-dependent monooxygenase (EC:1.14.-.-); K00517[EC:1.14.-.-]
AL_scaffold74_50	FAD-dependent monooxygenase (EC:1.14.-.-); K00517[EC:1.14.-.-]
11095
AA_scaffold6_2240
AL_scaffold74_65
11096
AA_scaffold6_2241
AL_scaffold74_67
11097
AA_scaffold6_2261	hypothetical protein; K06867
AL_scaffold232_4652	hypothetical protein; K06867
11102
AA_scaffold6_2331
AL_scaffold104_1876
11103
AA_scaffold6_2356	Q014T4_OSTTA Chromosome 07 contig 1, DNA sequence OS=Ostreococcus tauri GN=Ot07g03220 PE=4 SV=1
AL_scaffold81_3050	Q014T4_OSTTA Chromosome 07 contig 1, DNA sequence OS=Ostreococcus tauri GN=Ot07g03220 PE=4 SV=1
11104
AA_scaffold6_2406
AL_scaffold26_4885
11106
AA_scaffold6_2437
AL_scaffold26_4860
11107
AA_scaffold6_2459
AL_scaffold27_777
11108
AA_scaffold6_2495
AL_scaffold27_778
11109
AA_scaffold6_2514	B2WJA2_PYRTR Putative uncharacterized protein OS=Pyrenophora tritici-repentis (strain Pt-1C-BFP) GN=PTRG_10061 PE=4 SV=1
AL_scaffold27_781	B2WJA2_PYRTR Putative uncharacterized protein OS=Pyrenophora tritici-repentis (strain Pt-1C-BFP) GN=PTRG_10061 PE=4 SV=1
11110
AA_scaffold6_2530
AL_scaffold27_707
11111
AA_scaffold6_2546	A9JTZ8_PHANO Putative uncharacterized protein OS=Phaeosphaeria nodorum (strain SN15 / ATCC MYA-4574 / FGSC 10173) GN=SNOG_20004 PE=4 SV=1
AL_scaffold27_687	A9JTZ8_PHANO Putative uncharacterized protein OS=Phaeosphaeria nodorum (strain SN15 / ATCC MYA-4574 / FGSC 10173) GN=SNOG_20004 PE=4 SV=1
11112
AA_scaffold6_2552
AL_scaffold27_711
11113
AA_scaffold6_2587
AL_scaffold27_690
11115
AA_scaffold6_2620
AL_scaffold90_3437
11117
AA_scaffold6_2661
AL_scaffold90_3458
11119
AA_scaffold7_10053	B2VXA7_PYRTR Predicted protein OS=Pyrenophora tritici-repentis (strain Pt-1C-BFP) GN=PTRG_03153 PE=4 SV=1
AL_scaffold3_8548	B2VXA7_PYRTR Predicted protein OS=Pyrenophora tritici-repentis (strain Pt-1C-BFP) GN=PTRG_03153 PE=4 SV=1
11120
AA_scaffold7_10094
AL_scaffold3_8532
11121
AA_scaffold7_10095
AL_scaffold3_8496
11122
AA_scaffold7_9237
AL_scaffold24_5179
11126
AA_scaffold7_9361
AL_scaffold146_3351
11127
AA_scaffold7_9376	B2WDN5_PYRTR Predicted protein OS=Pyrenophora tritici-repentis (strain Pt-1C-BFP) GN=PTRG_08094 PE=4 SV=1
AL_scaffold146_3362	B2WDN5_PYRTR Predicted protein OS=Pyrenophora tritici-repentis (strain Pt-1C-BFP) GN=PTRG_08094 PE=4 SV=1
11128
AA_scaffold7_9378
AL_scaffold146_3364
11129
AA_scaffold7_9395
AL_scaffold25_2878
11130
AA_scaffold7_9396
AL_scaffold25_2879
11131
AA_scaffold7_9415
AL_scaffold25_2895
11132
AA_scaffold7_9416
AL_scaffold25_2896
11133
AA_scaffold7_9418
AL_scaffold25_2898
11136
AA_scaffold7_9481	B2W4D7_PYRTR Putative uncharacterized protein OS=Pyrenophora tritici-repentis (strain Pt-1C-BFP) GN=PTRG_04487 PE=4 SV=1
AL_scaffold25_2958	B2W4D7_PYRTR Putative uncharacterized protein OS=Pyrenophora tritici-repentis (strain Pt-1C-BFP) GN=PTRG_04487 PE=4 SV=1
11137
AA_scaffold7_9482
AL_scaffold25_2960
11138
AA_scaffold7_9484
AL_scaffold25_2963
11139
AA_scaffold7_9520
AL_scaffold97_3816
11141
AA_scaffold7_9579	mtnN; Mta (EC:3.2.2.9); K01243 S-adenosylhomocysteine/5'-methylthioadenosine nucleosidase [EC:3.2.2.9]
AL_scaffold115_11402	ankyrin; K06867
11144
AA_scaffold7_9643
AL_scaffold56_9455
11145
AA_scaffold7_9714	B2WKJ9_PYRTR Predicted protein OS=Pyrenophora tritici-repentis (strain Pt-1C-BFP) GN=PTRG_10509 PE=4 SV=1
AL_scaffold38_9123	B2WKJ9_PYRTR Predicted protein OS=Pyrenophora tritici-repentis (strain Pt-1C-BFP) GN=PTRG_10509 PE=4 SV=1
11146
AA_scaffold7_9746
AL_scaffold3_8829
11147
AA_scaffold7_9759
AL_scaffold38_9160
11148
AA_scaffold7_9816	G2XGQ5_VERDV Putative uncharacterized protein OS=Verticillium dahliae (strain VdLs.17 / ATCC MYA-4575 / FGSC 10137) GN=VDAG_09337 PE=4 SV=1
AL_scaffold3_8783	G2XGQ5_VERDV Putative uncharacterized protein OS=Verticillium dahliae (strain VdLs.17 / ATCC MYA-4575 / FGSC 10137) GN=VDAG_09337 PE=4 SV=1
11149
AA_scaffold7_9817
AL_scaffold3_8784
11150
AA_scaffold7_9827	hypothetical protein ; K07359 calcium/calmodulin-dependent protein kinase kinase [EC:2.7.11.17]
AL_scaffold3_8766	PKH2; Pkh2p (EC:2.7.11.1); K08286 protein-serine/threonine kinase [EC:2.7.11.-]
11152
AA_scaffold7_9970
AL_scaffold3_8669
11153
AA_scaffold87_29	E9HZG9_DAPPU Putative uncharacterized protein (Fragment) OS=Daphnia pulex GN=DAPPUDRAFT_67638 PE=4 SV=1
AL_scaffold618_2455	E9HZG9_DAPPU Putative uncharacterized protein (Fragment) OS=Daphnia pulex GN=DAPPUDRAFT_67638 PE=4 SV=1
11154
AA_scaffold87_30	Q7TMB1_RAT Aa1011 OS=Rattus norvegicus GN=LOC310926 PE=2 SV=1
AL_scaffold618_2456	F7AA48_ORNAN Uncharacterized protein (Fragment) OS=Ornithorhynchus anatinus PE=4 SV=1
11156
AA_scaffold8_5148
AL_scaffold5_7120
11160
AA_scaffold8_5187
AL_scaffold5_7085
11161
AA_scaffold8_5188
AL_scaffold5_7050
11162
AA_scaffold8_5189
AL_scaffold5_7051
11163
AA_scaffold8_5232
AL_scaffold5_7052
11165
AA_scaffold8_5251
AL_scaffold242_11154
11167
AA_scaffold8_5312
AL_scaffold17_9373
11169
AA_scaffold8_5402
AL_scaffold29_2338
11171
AA_scaffold8_5463
AL_scaffold29_2285
11172
AA_scaffold8_5480
AL_scaffold29_2270
11174
AA_scaffold8_5500
AL_scaffold61_12534
11175
AA_scaffold8_5501
AL_scaffold61_12535
11176
AA_scaffold8_5502
AL_scaffold61_12536
11181
AA_scaffold8_5570	G2Y2A2_BOTF4 Putative uncharacterized protein BofuT4_P114980.1 OS=Botryotinia fuckeliana (strain T4) GN=BofuT4_P114980.1 PE=4 SV=1
AL_scaffold245_3994	F9XNU0_MYCGM Putative uncharacterized protein OS=Mycosphaerella graminicola (strain CBS 115943 / IPO323) GN=MYCGRDRAFT_97076 PE=4 SV=1
11183
AA_scaffold8_5590
AL_scaffold173_2764
11192
AA_scaffold9_3543
AL_scaffold12_6035
11193
AA_scaffold9_3559
AL_scaffold12_6053
11194
AA_scaffold9_3560
AL_scaffold12_6056
11196
AA_scaffold9_3563
AL_scaffold12_6058
11197
AA_scaffold9_3594
AL_scaffold12_6091
11198
AA_scaffold9_3614
AL_scaffold12_6126
11199
AA_scaffold9_3648
AL_scaffold12_6128
11200
AA_scaffold9_3661
AL_scaffold12_6158
11204
AA_scaffold9_3681
AL_scaffold54_521
11205
AA_scaffold9_3700
AL_scaffold12_6157
11206
AA_scaffold9_3702
AL_scaffold54_551
11207
AA_scaffold9_3735
AL_scaffold54_553
11209
AA_scaffold9_3795
AL_scaffold78_11983
11210
AA_scaffold9_3802	B2VZZ2_PYRTR Predicted protein OS=Pyrenophora tritici-repentis (strain Pt-1C-BFP) GN=PTRG_02982 PE=4 SV=1
AL_scaffold78_11940	B2VZZ2_PYRTR Predicted protein OS=Pyrenophora tritici-repentis (strain Pt-1C-BFP) GN=PTRG_02982 PE=4 SV=1
11212
AA_scaffold9_3890
AL_scaffold60_3138
11213
AA_scaffold9_3908
AL_scaffold60_3166
11214
AA_scaffold9_3923
AL_scaffold248_1025
11215
AA_scaffold9_3924	A8BI94_GIAIC Putative uncharacterized protein OS=Giardia intestinalis (strain ATCC 50803 / WB clone C6) GN=GL50803_27543 PE=4 SV=1
AL_scaffold60_3141	A8BI94_GIAIC Putative uncharacterized protein OS=Giardia intestinalis (strain ATCC 50803 / WB clone C6) GN=GL50803_27543 PE=4 SV=1
11216
AA_scaffold9_3957
AL_scaffold45_5078
11217
AA_scaffold9_3990
AL_scaffold45_5043
11218
AA_scaffold9_4028
AL_scaffold45_5083
Note: The gene family here is generated by OrthoMCL, which means a set of orthologs or paralogs.
